# Supplementary material for: The Singular Molecular Conformation of Humic Acids in Solution Influences Their Ability to Enhance Root Hydraulic Conductivity and Plant Growth
Source: MDPI journal article supplement (doi:10.3390/molecules26010003), 2020-12-22
Supplement: s1 [file s1]

## Supplementary material

### The singular molecular conformation of humic acids in solution influences their ability to enhance root hydraulic conductivity and plant growth.

Maite Olaetxea <sup>1</sup>, Veronica Mora <sup>2</sup>, Roberto Baigorri <sup>3</sup>, Angel M Zamarreño <sup>4</sup> and Jose M García-Mina <sup>5</sup>

<sup>1</sup>Department of Environmental Biology, BIOMA Institut, Sciences School, University of Navarra; molaetxea@unav.es

<sup>2</sup>Plant Physiology and plant-microorganism interaction laboratory. Universidad Nacional de Río Cuarto. Córdoba. Argentina; moraveronica@yahoo.com.ar

<sup>3</sup> Department of Environmental Biology, BIOMA Institut, Sciences School, University of Navarra; roberto.baigorri@tervalies.com

<sup>4</sup> Department of Environmental Biology, BIOMA Institut, Sciences School, University of Navarra; angelmarizama@unav.es

<sup>5</sup> Department of Environmental Biology, BIOMA Institut, Sciences School, University of Navarra; jgmina@unav.es

### Humic acid MW characterization:

DOSY H1 NMR was performed to calculate the MW distribution of HA. A Nuclear Magnetic Resonance Bruker AVANCE AV-500 (500 MHz) was utilized using a <sup>1</sup>H-broadband inverse probe. Spectrum was acquired by 128 scans with 2 ms pulses, with 100-200 ms diffusion time. Diffusion coefficients were calculated by using MestReC 4.7.0.0.© 2005 software.

Diffusion coefficients were calculated as follow:

$$I = I_0 \exp \left[ - D_f (\Delta - \delta / 3 - \tau / 2) (g \gamma \delta)^2 \right]$$

where I is resonance spectrum intensity, I<sub>0</sub> is resonance spectrum intensity without gradient pulse,  $\Delta$  is diffusion time, g y  $\tau$  are gradient pulse amplitude and time respectively,  $\delta$  pulses delay,  $\gamma$  H gyromagnetic radius: 26571 and D<sub>f</sub> diffusion coefficient. Gradient intensity follows a decay line and mono exponential non-linear curve fit was applied for each DOSY spectrum peak,

$$f(x) = B \exp(-x F)$$

where F is the diffusion coefficient.

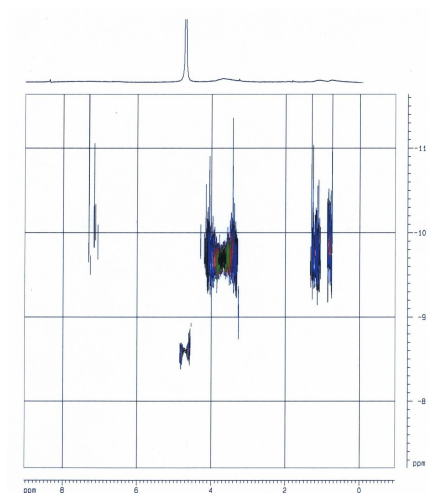

Figure S1. DOSY H1 NMR Spectrum from HA 100 mg L<sup>-1</sup>

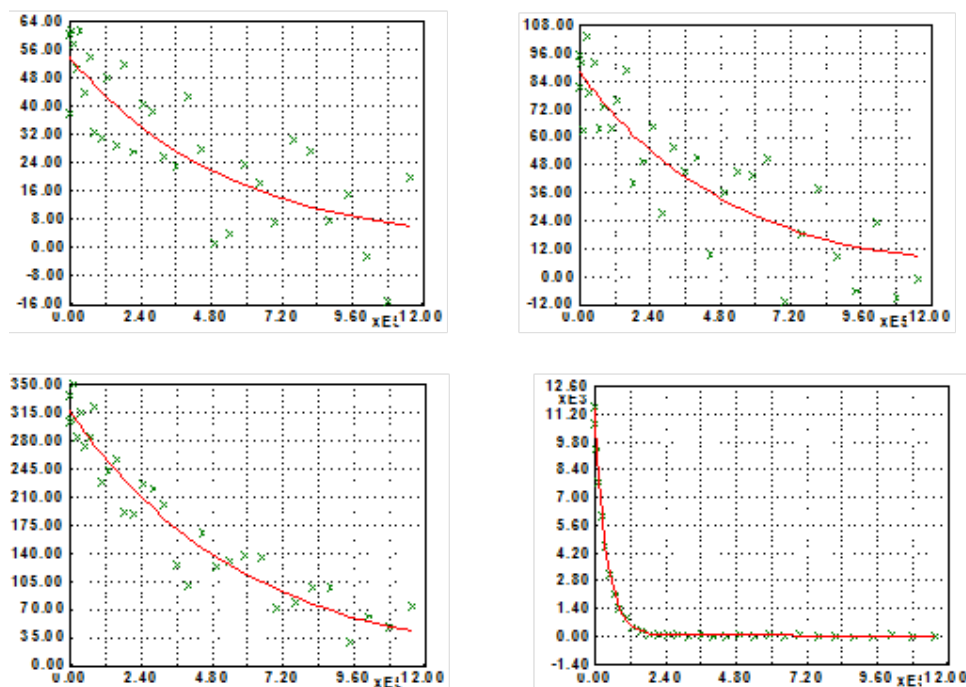

| Dosy H1 NMR Peaks | $D_f$     | MW    |
|-------------------|-----------|-------|
| 1.20 ppm          | 2,26 E-10 | 2163  |
| 2.14 ppm          | 1.14 E-10 | 9482  |
| 3.75 ppm          | 7.50 E-11 | 23422 |
| D <sub>2</sub> O  | 2.00 E-09 | 19    |

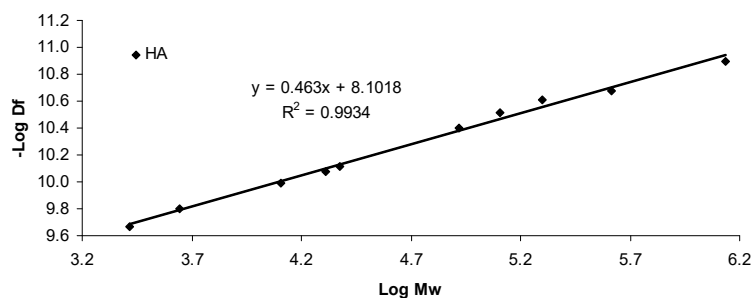

Figure S2: Decay line,  $D_f$  and Molecular Weight (MW) calculated from HA 100 mg L<sup>-1</sup>. MW was calculated by interpolation using  $D_f$  from Cameron et al. 1972: Cameron, R. S., Thornton, B. K., Swift, R. S., Posner, A. M., Molecular weight and shape of humic acid from sedimentation and diffusion measurements on fractionated extracts. *European Journal of Soil Science* **197**, 23, 394-408.

## Fluorescence spectroscopy

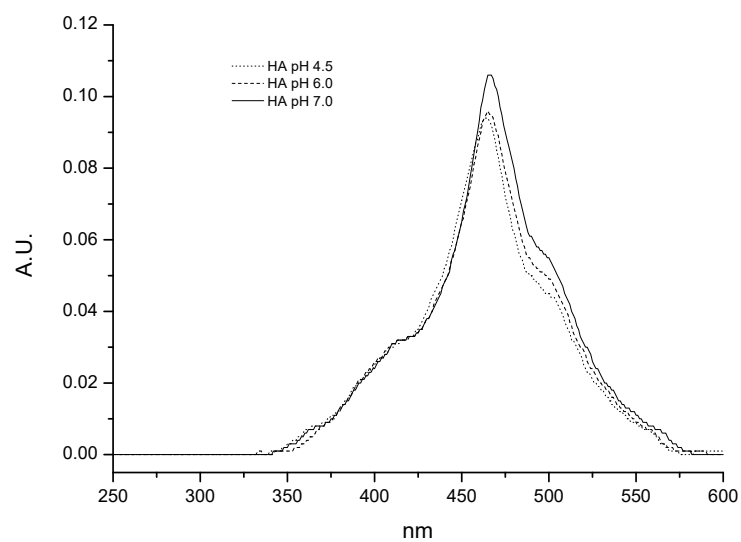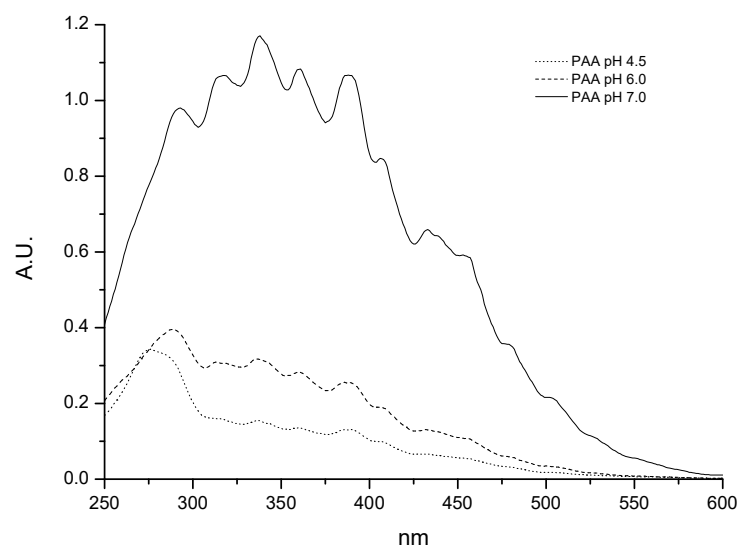

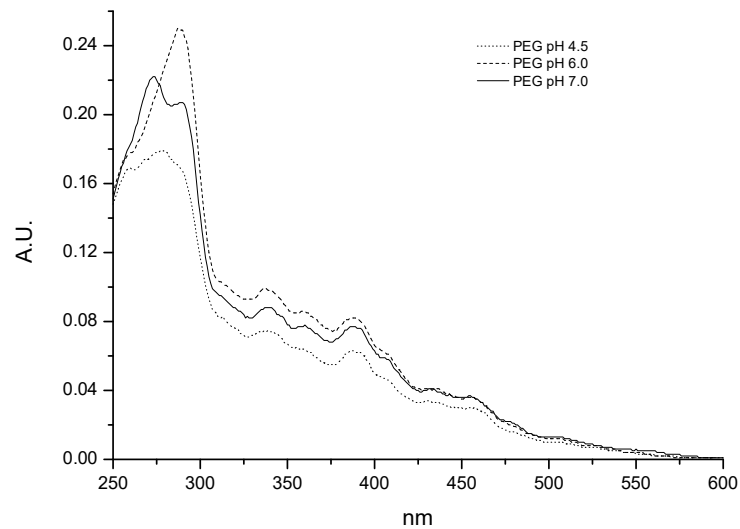

Figure S3. Synchronous fluorescence spectra for HA, PAA and PEG as a function of pH. Synchronous spectra were recorded between 250–600 nm wavelengths, with a 5-nm slit width on both monochromators. The scan speed of spectra 120 nm min<sup>-1</sup> and resolution 0.5 nm.

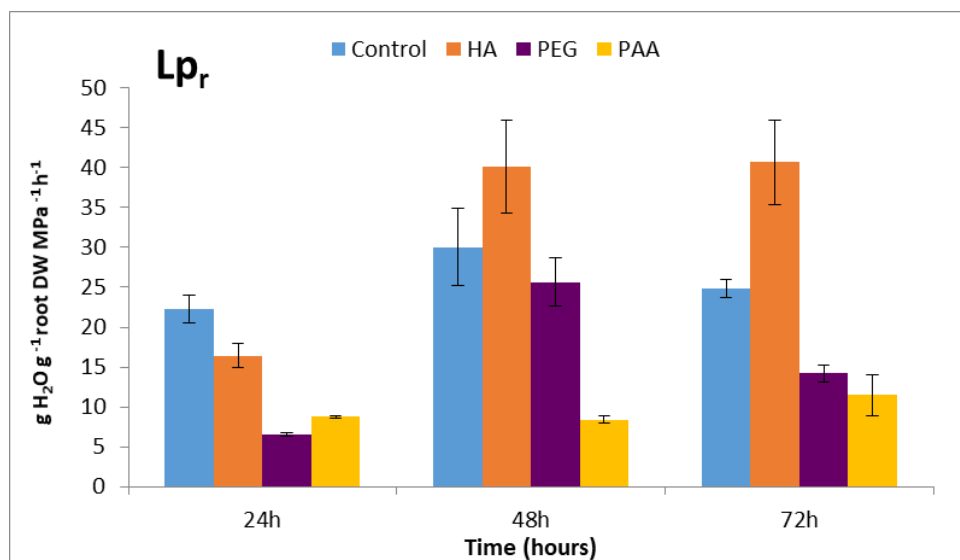

Figure S4:  $L_{pr} \pm$  standard error ( $n=5$ ). Time evolution of  $L_{pr}$  for the treated plants. Measurements were carried out after 24, 48 and 72 hours of treatment. Experiments were repeated three times.
